# Supplementary material for: Isolation and Characterization of Urinary Extracellular Vesicles from Healthy Donors and Patients with Castration-Resistant Prostate Cancer
Source: MDPI journal article supplement (doi:10.3390/ijms23137134), 2022-06-27
Supplement: s1 [file s1]

## **Supplementary Information**

### **Isolation and characterization of urinary extracellular vesicles from healthy donors and patients with castration-resistant prostate cancer**

**Haneul Lee<sup>1</sup>, Su Jin Kang<sup>1</sup>, Jimin Lee<sup>2</sup>, Kyong Hwa Park<sup>2\*</sup> and Won Jong Rhee<sup>1,3,4,\*</sup>**

<sup>1</sup> Department of Bioengineering and Nano-Bioengineering, Incheon National University, Incheon 22012, Republic of Korea.

<sup>2</sup> Division of Oncology/Hematology, Department of Internal Medicine, Korea University College of Medicine, Seoul 02841, Republic of Korea

<sup>3</sup> Division of Bioengineering, Incheon National University, Incheon 22012, Republic of Korea.

<sup>4</sup> Research Center for Bio Materials & Process Development, Incheon National University, 119 Academy-ro, Yeonsu-gu, Incheon 22012, Republic of Korea

\* Correspondence: W.J.Rhee, Tel: +82 32 835 8299; Fax: +82 32 835 0763;  
Email: wjrhee@inu.ac.kr; K.H.Park, Email: khpark@korea.ac.kr

#### **Supplementary Information includes:**

Figure S1: Relative expression levels of cancer-related miRNAs in urinary EVs from healthy donors.

**Supplementary figures:**

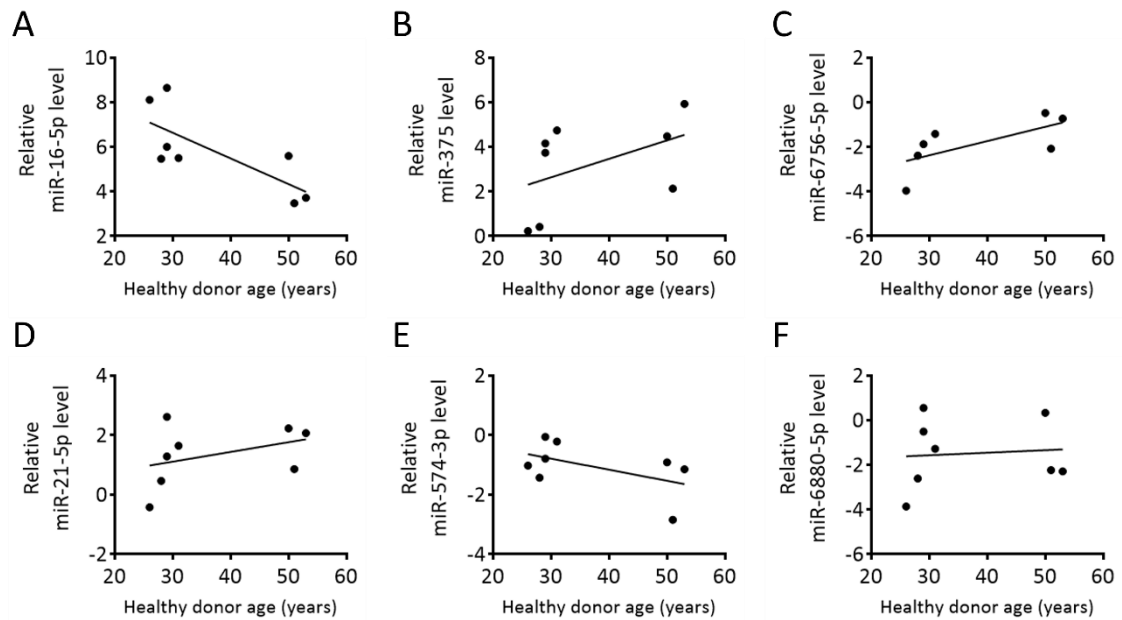

**Figure S1.** Correlations between age and individual miRNA levels in urinary EVs from healthy donors. Correlation of age with (A) miR-16-5p, (B) miR-375, (C) miR-6756-5p, (D) miR-21-5p, (E) miR-574-3p, and (F) miR-6880-5p. Relative miRNA levels in urinary EVs from healthy donors were analyzed using RT-PCR and normalized ( $\Delta C_T$  analysis) to expression levels for the U6 snRNA gene and are shown as log2 value. Correlation of age with miRNA expression levels was calculated using Pearson's correlation.
